# Supplementary material for: A System Biology Approach Reveals New Targets for Human Thyroid Gland Toxicity in Embryos and Adult Individuals
Source: MDPI journal article supplement (doi:10.3390/metabo14040226), 2024-04-16
Supplement: s1 [file s1]

Supplementary Table S1 - Summary of the interaction between chemical compounds and upregulated genes in embryonic thyroid

| Rank | MeSH Pharmacological Classification | Chemical Compound                       | PubChem CID     | Gene/Protein interaction       |
|------|-------------------------------------|-----------------------------------------|-----------------|--------------------------------|
| 1    | Antineoplastic Agents               | Atrasentan                              | 159594          | GPX1                           |
|      |                                     | Fenretinide                             | 5288209         | GPX1                           |
|      |                                     | Prolinedithiocarbamate                  | 105009          | GPX1                           |
|      |                                     | Tamoxifen                               | 2733526         | GPX1                           |
|      |                                     | Triptolide                              | 107985          | GPX1                           |
|      |                                     | Alvocidib                               | 5287969         | LYN                            |
|      |                                     | Bortezomib                              | 387447          | LYN                            |
|      |                                     | Honokiol                                | 72303           | LYN                            |
|      |                                     | Ponatinib                               | 24826799        | LYN                            |
|      |                                     | Masitinib                               | 10074640        | LYN                            |
| 2    | Antioxidants                        | 2-tert-butylhydroquinone                | 16043           | GPX1                           |
|      |                                     | Acetovanillone/ apocynin                | 2214            | GPX1                           |
|      |                                     | Probuco                                 | 4912            | GPX1                           |
|      |                                     | Prolinedithiocarbamate                  | 105009          | GPX1                           |
|      |                                     | Resveratrol                             | 445154          | GPX1                           |
|      |                                     | Selenic acid                            | 1089            | GPX1                           |
|      |                                     | Diosmin                                 | 5281613         | GPX1                           |
| 2    | Anti-Inflammatory Agents            | Acetovanillone/ apocynin                | 2214            | GPX1                           |
|      |                                     | Ketorolac tromethamine                  | 84003           | GPX1                           |
|      |                                     | Nimesulide                              | 4495            | GPX1                           |
|      |                                     | Taxifolin                               | 439533          | GPX1                           |
|      |                                     | Methylprednisolone                      | 6741            | GPX1                           |
|      |                                     | Thymoquinone                            | 10281           | GPX1                           |
|      |                                     | Trilobatin                              | 6451798         | GPX1                           |
| 4    | Natural compound                    | Ginsenoside Re                          | 53789984 (SID)  | GPX1                           |
|      |                                     | Isocytiside                             | 160749          | GPX1                           |
|      |                                     | Thymoquinone                            | 10281           | GPX1                           |
|      |                                     | Triptonide                              | 65411           | LYN                            |
|      |                                     | Trilobatin                              | 6451798         | GPX1                           |
|      |                                     | Zingiberis rhizome carbonisata          | 442882585 (SID) | GPX1                           |
| 5    | Enzyme Inhibitors                   | 2-tert-butylhydroquinone                | 16043           | GPX1                           |
|      |                                     | Acetovanillone/ apocynin                | 2214            | GPX1                           |
|      |                                     | Resveratrol                             | 445154          | GPX1                           |
|      |                                     | Honokiol                                | 72303           | LYN                            |
|      |                                     | Mycophenolic acid                       | 446541          | LYN                            |
| 6    | Indicators and Reagents             | Phenolsulfonphthalein                   | 4766            | H2AC12                         |
|      |                                     | Brucine                                 | 442021          | GPX1                           |
|      |                                     | Thioacetamide                           | 2723949         | GPX1                           |
|      |                                     | Benzamide                               | 2331            | LYN                            |
| 6    | Protein Kinase Inhibitors           | Alvocidib                               | 5287969         | LYN                            |
|      |                                     | Bafetinib                               | 11387605        | LYN                            |
|      |                                     | Masitinib                               | 10074640        | LYN                            |
|      |                                     | Ponatinib                               | 24826799        | LYN                            |
| 7    | Antiparasitic/ Pediculicide         | Ivermectin                              | 6321424         | H2AC12<br>HLA-B<br>GPX1<br>LYN |
| 7    | Herbicides                          | 1-methyl-4-phenylpyridinium (Cyperquat) | 39484           | GPX1                           |
|      |                                     | Arsenic acid                            | 234             | GPX1                           |
|      |                                     | Diaminochlorotriazine                   | 21897015        | GPX1                           |
| 7    | Anti-Bacterial Agents               | Ampicillin                              | 6249            | GPX1                           |
|      |                                     | Metronidazole                           | 4173            | GPX1                           |
|      |                                     | Vancomycin                              | 14969           | GPX1                           |

|    |                                            |                            |                 |        |
|----|--------------------------------------------|----------------------------|-----------------|--------|
| 7  | Flavouring Agents                          | Carvacrol                  | 10364           | GPX1   |
|    |                                            | Diphenyl disulfide         | 13436           | GPX1   |
|    |                                            | Raspberry ketone           | 21648           | GPX1   |
| 7  | dyes                                       | Gallein                    | 73685           | GPX1   |
|    |                                            | Phycocyanin                | 53837743 (SID)  | GPX1   |
|    |                                            | Benzanthrone               | 6697            | LYN    |
| 7  | Anti-Infective Agents                      | Metronidazole              | 4173            | GPX1   |
|    |                                            | Furaltadone                | 9553856         | LYN    |
|    |                                            | Honokiol                   | 72303           | LYN    |
| 8  | Cholinesterase Inhibitors                  | Paraoxon                   | 9395            | H2AC12 |
|    |                                            | Phosphamidon               | 3032604         | GPX1   |
| 8  | Insecticides                               | Paraoxon                   | 9395            | H2AC12 |
|    |                                            | Phosphamidon               | 3032604         | GPX1   |
| 8  | carcinogenic agent                         | Monomethylarsonous acid    | 161491          | HLA-B  |
|    |                                            | Pirinixic acid             | 5694            | GPX1   |
| 8  | Food additives                             | Allyl methyl sulfide       | 66282           | GPX1   |
|    |                                            | Trehalose                  | 7427            | GPX1   |
| 8  | Antirheumatic Agents                       | Auranofin                  | 24199313        | GPX1   |
|    |                                            | Thiomalates                | 136368256 (SID) | GPX1   |
| 8  | Antibiotics, Antineoplastic                | Bleomycin                  | 5360373         | GPX1   |
|    |                                            | Mycophenolic acid          | 446541          | LYN    |
| 8  | Peroxisome Proliferators                   | Ciprofibrate               | 2763            | GPX1   |
|    |                                            | Pirinixic acid             | 5694            | GPX1   |
| 8  | Alkylating Agents                          | Diethylnitrosamine         | 5921            | GPX1   |
|    |                                            | Triptolide                 | 107985          | GPX1   |
| 8  | Cyclooxygenase Inhibitors                  | Ketorolac tromethamine     | 84003           | GPX1   |
|    |                                            | Nimesulide                 | 4495            | GPX1   |
| 8  | skin conditioning                          | Luteolin                   | 5280445         | GPX1   |
|    |                                            | Rhododendrol               | 919205          | GPX1   |
| 8  | Antibacterial                              | Neomycin                   | 8378            | GPX1   |
|    |                                            | Thymoquinone               | 10281           | GPX1   |
| 8  | Anticholesteremic Agents                   | Pirinixic acid             | 5694            | GPX1   |
|    |                                            | Probucol                   | 4912            | GPX1   |
| 8  | Trace Elements                             | Selenic acid               | 1089            | GPX1   |
|    |                                            | Vanadates                  | 61672           | LYN    |
| 8  | anti-oxidative                             | Thymoquinone               | 10281           | GPX1   |
|    |                                            | Trilobatin                 | 6451798         | GPX1   |
| 8  | Immunomodulatory/ Immunosuppressive Agents | Thymoquinone               | 10281           | GPX1   |
|    |                                            | Triptolide                 | 107985          | GPX1   |
| 29 | Coloring Agents                            | Phenolsulfonphthalein      | 4766            | H2AC12 |
| 29 | Anti-HIV Agents                            | Abacavir                   | 441300          | HLA-B  |
| 29 | Reverse Transcriptase Inhibitors           | Abacavir                   | 441300          | HLA-B  |
| 29 | Flavoring Agents                           | Allyl methyl sulfide       | 66282           | GPX1   |
| 29 | Chemosterilants                            | Alpha-chlorohydrin         | 7290            | GPX1   |
| 29 | Teratogens                                 | Arsenic acid               | 234             | GPX1   |
| 29 | Endothelin A Receptor Antagonists          | Atrasentan                 | 159594          | GPX1   |
| 29 | Adjuvants, Immunologic                     | Brucine                    | 442021          | GPX1   |
| 29 | Analgesics                                 | Brucine                    | 442021          | GPX1   |
| 29 | Antimetabolites, Antineoplastic            | Capecitabine               | 60953           | GPX1   |
| 29 | Hypolipidemic Agents                       | Ciprofibrate               | 2763            | GPX1   |
| 29 | Mast Cell Stabilizers                      | Cromolyn sodium            | 27503           | GPX1   |
| 29 | Anti-Asthmatic Agents                      | Cromolyn sodium            | 27503           | GPX1   |
| 29 | Oxidants                                   | Cumene hydroperoxide       | 6629            | GPX1   |
| 29 | Mineralocorticoids                         | Desoxycorticosterone       | 6166            | GPX1   |
| 29 | Succinates                                 | Dimethyl mercaptosuccinate | 95335           | GPX1   |
| 29 | Cannabinoid Receptor Agonists              | Dronabinol                 | 16078           | GPX1   |
| 29 | Analgesics, Non-Narcotic                   | Dronabinol                 | 16078           | GPX1   |
| 29 | Hallucinogens                              | Dronabinol                 | 16078           | GPX1   |
| 29 | Psychotropic Drugs                         | Dronabinol                 | 16078           | GPX1   |
| 29 | Anticarcinogenic Agents                    | Fenretinide                | 5288209         | GPX1   |
| 29 | Hematinics                                 | Folic acid                 | 135398658       | GPX1   |

|    |                                         |                         |           |      |
|----|-----------------------------------------|-------------------------|-----------|------|
| 29 | Vitamin B Complex                       | Folic acid              | 135398658 | GPX1 |
| 29 | Dopamine Agents                         | Levodopa                | 6047      | GPX1 |
| 29 | Antiparkinson Agents                    | Levodopa                | 6047      | GPX1 |
| 29 | Fungicides, Industrial                  | Maneb                   | 3032581   | GPX1 |
| 29 | Central Nervous System Stimulants       | Mephedrone              | 45266826  | GPX1 |
| 29 | Glucocorticoids                         | Methylprednisolone      | 6741      | GPX1 |
| 29 | Antiemetics                             | Methylprednisolone      | 6741      | GPX1 |
| 29 | Neuroprotective Agents                  | Methylprednisolone      | 6741      | GPX1 |
| 29 | Antiprotozoal Agents                    | Metronidazole           | 4173      | GPX1 |
| 29 | Aminoglycoside                          | Neomycin                | 8378      | GPX1 |
| 29 | Mutagens                                | Pirinixic acid          | 5694      | GPX1 |
| 29 | Platelet Aggregation Inhibitors         | Resveratrol             | 445154    | GPX1 |
| 29 | Bone Density Conservation Agents        | Tamoxifen               | 2733526   | GPX1 |
| 29 | Estrogen Antagonists                    | Tamoxifen               | 2733526   | GPX1 |
| 29 | Selective Estrogen Receptor Modulators  | Tamoxifen               | 2733526   | GPX1 |
| 29 | Catalyst                                | Tert-butylhydroperoxide | 6410      | GPX1 |
| 29 | Chelating Agents                        | Trientine               | 5565      | GPX1 |
| 29 | Antispermatogetic Agents                | Triptolide              | 107985    | GPX1 |
| 29 | Antihypertensive Agents                 | Valsartan               | 60846     | GPX1 |
| 29 | Angiotensin II Type 1 Receptor Blockers | Valsartan               | 60846     | GPX1 |
| 29 | Mouthwashes                             | Zinc chloride           | 5727      | GPX1 |
| 29 | Cariostatic Agents                      | Aluminum fluoride       | 2124      | LYN  |
| 29 | Growth Inhibitors                       | Alvocidib               | 5287969   | LYN  |
| 29 | Anti-Anxiety Agents                     | Honokiol                | 72303     | LYN  |
| 29 | Anti-Arrhythmia Agents                  | Honokiol                | 72303     | LYN  |
| 29 | Anti-Allergic Agents                    | Honokiol                | 72303     | LYN  |
| 29 | Phytogenic                              | Honokiol                | 72303     | LYN  |
| 29 | Central Nervous System Depressants      | Honokiol                | 72303     | LYN  |
| 29 | Gastrointestinal Agents                 | Honokiol                | 72303     | LYN  |
| 29 | Antibiotics, Antitubercular             | Mycophenolic acid       | 446541    | LYN  |
