# Supplementary material for: A System Biology Approach Reveals New Targets for Human Thyroid Gland Toxicity in Embryos and Adult Individuals
Source: MDPI journal article supplement (doi:10.3390/metabo14040226), 2024-04-16
Supplement: s1 [file s1]

Supplementary Table S4 - Summary of the interaction between chemical compounds and downregulated genes in adult thyroid

| Rank | MeSH Pharmacological Classification     | Chemical Compound        | PubChem CID     | Gene/Protein interaction         |
|------|-----------------------------------------|--------------------------|-----------------|----------------------------------|
| 1    | Antineoplastic Agents                   | Tretinoin                | 444795          | DEFA3                            |
|      |                                         | Neocuproine              | 65237           | CXCL1                            |
|      |                                         | Crizotinib               | 11626560        | CDA                              |
|      |                                         | Oxaliplatin              | 9887053         | CDA<br>TYMS                      |
|      |                                         | Bicalutamide             | 2375            | TYMS                             |
|      |                                         | Gefitinib                | 123631          | TYMS                             |
|      |                                         | Palbociclib              | 5330286         | TYMS                             |
|      |                                         | Pemetrexed               | 135410875       | TYMS                             |
|      |                                         | Vorinostat               | 5311            | TYMS                             |
|      |                                         | Pyrazolanthrone          | 8515            | CXCL1                            |
|      |                                         | Cinobufagin              | 11969542        | TYMS                             |
|      |                                         | Paclitaxel               | 36314           | LGALS4<br>CDA<br>TYMS            |
| 1    | Antimetabolites, Antineoplastic         | S 1 (combination)        | 54715158        | PRSS2<br>PRSS3<br>LGALS4<br>TYMS |
|      |                                         | Capecitabine             | 60953           | LGALS4<br>TYMS                   |
|      |                                         | Doxifluridine            | 18343           | LGALS4<br>TYMS                   |
|      |                                         | Decitabine               | 451668          | CDA                              |
|      |                                         | Gemcitabine              | 60750           | CDA<br>RRM2                      |
|      |                                         | Cytarabine               | 6253            | TYMS                             |
|      |                                         | Floxuridine              | 5790            | TYMS                             |
|      |                                         | Nolatrexed               | 135400184       | TYMS                             |
| 3    | Enzyme Inhibitors                       | Raltitrexed              | 135400182       | TYMS                             |
|      |                                         | Acetovanillone /apocynin | 2214            | CXCL1                            |
|      |                                         | Metirapone               | 4174            | CXCL1                            |
|      |                                         | Resveratrol              | 445154          | CXCL1                            |
|      |                                         | Decitabine               | 451668          | CDA                              |
|      |                                         | Cyclosporine             | 5284373         | TYMS                             |
|      |                                         | Nolatrexed               | 135400184       | TYMS                             |
| 4    | Anti-Inflammatory Agents, Non-Steroidal | Pemetrexed               | 135410875       | TYMS                             |
|      |                                         | Fluorodeoxyuridylate     | 8642            | TYMS                             |
|      |                                         | Acetovanillone /apocynin | 2214            | CXCL1                            |
|      |                                         | Indomethacin             | 3715            | CXCL1                            |
|      |                                         | Mesalamine               | 4075            | CXCL1                            |
|      |                                         | Shikonin                 | 479503          | CXCL1                            |
| 4    | Carcinogens                             | Sulfasalazine            | 483928815 (SID) | CXCL1                            |
|      |                                         | Zileuton                 | 60490           | CXCL1                            |
|      |                                         | Azoxymethane             | 33184           | CXCL1                            |
|      |                                         | Phorbol 12,13-dibutyrate | 37783           | CXCL1                            |
|      |                                         | Aristolochic acid I      | 2236            | RRM2                             |
|      |                                         | Glycidyl methacrylate    | 7837            | TYMS                             |
| 6    | Immunosuppressive Agents                | Sterigmatocystin         | 5280389         | CXCL1                            |
|      |                                         | Glycidyl methacrylate    | 7837            | TYMS                             |
|      |                                         | Triptolide               | 107985          | CXCL1                            |
|      |                                         | Doxifluridine            | 18343           | LGALS4<br>TYMS                   |
|      |                                         | Cyclosporine             | 5284373         | TYMS                             |
| 6    | Immunosuppressive Agents                | Cytarabine               | 6253            | TYMS                             |
|      |                                         | Doxifluridine            | 18343           | LGALS4                           |

|    |                                         |                          |                 |       |
|----|-----------------------------------------|--------------------------|-----------------|-------|
|    |                                         |                          |                 | TYMS  |
| 7  | Protein Kinase Inhibitors               | Doramapimod              | 156422          | CXCL1 |
|    |                                         | Pyrazolanthrone          | 8515            | CXCL1 |
|    |                                         | Erlotinib hydrochloride  | 176871          | TYMS  |
|    |                                         | Palbociclib              | 5330286         | TYMS  |
| 7  | Dermatologic Agents                     | Ferric oxide             | 53790672 (SID)  | CXCL1 |
|    |                                         | Fluticasone              | 5311101         | CXCL1 |
|    |                                         | Cyclosporine             | 5284373         | TYMS  |
|    |                                         | Hesperidin               | 10621           | CXCL1 |
| 9  | Antioxidants                            | Acetovanillone /apocynin | 2214            | CXCL1 |
|    |                                         | Ascorbic acid            | 54670067        | CXCL1 |
|    |                                         | Resveratrol              | 445154          | CXCL1 |
| 9  | Natural product                         | Astringin                | 5281712         | CXCL1 |
|    |                                         | Coagulin-L               | 10508451        | CXCL1 |
|    |                                         | Monocrotaline            | 9415            | CXCL1 |
| 9  | Anti-Inflammatory Agents                | Belnacasan               | 11398092        | CXCL1 |
|    |                                         | Budesonide               | 5281004         | CXCL1 |
|    |                                         | Fluticasone              | 5311101         | CXCL1 |
| 9  | Antihypertensive Agents                 | Benazepril               | 5362124         | CXCL1 |
|    |                                         | Candesartan              | 2541            | CXCL1 |
|    |                                         | Losartan                 | 3961            | CXCL1 |
| 9  | Anti-Allergic Agents                    | Cetirizine               | 2678            | CXCL1 |
|    |                                         | Fluticasone              | 5311101         | CXCL1 |
|    |                                         | Methapyrilene            | 4098            | CXCL1 |
| 9  | Tyrosine Kinase Inhibitors              | Quizartinib              | 24889392        | TYMS  |
|    |                                         | Crizotinib               | 11626560        | CDA   |
|    |                                         | Gefitinib                | 123631          | TYMS  |
| 9  | Nucleic Acid Synthesis Inhibitors       | Mitomycin                | 5746            | CDA   |
|    |                                         | Idoxuridine              | 5905            | TYMS  |
|    |                                         | Pemetrexed               | 135410875       | TYMS  |
| 9  | Antifungal Agents                       | Ciclopirox               | 2749            | RRM2  |
|    |                                         | Cyclosporine             | 5284373         | TYMS  |
|    |                                         | Trichostatin A           | 444732          | TYMS  |
| 9  | Antiviral Agents                        | Cytarabine               | 6253            | TYMS  |
|    |                                         | Idoxuridine              | 5905            | TYMS  |
|    |                                         | Stallimycin              | 3115            | TYMS  |
| 9  | Folic Acid Antagonists                  | Nolatrexed               | 135400184       | TYMS  |
|    |                                         | Pemetrexed               | 135410875       | TYMS  |
|    |                                         | Raltitrexed              | 135400182       | TYMS  |
| 9  | Reagents and solvents                   | Hydrochloric acid        | 313             | CXCL1 |
|    |                                         | Mitomycin                | 5746            | CDA   |
|    |                                         | Pseudocumene             | 7247            | CXCL1 |
| 20 | Muscarinic Antagonist                   | Atropine                 | 174174          | CXCL1 |
|    |                                         | Benztropine              | 1201549         | TYMS  |
| 20 | Bronchodilator Agents                   | Budesonide               | 5281004         | CXCL1 |
|    |                                         | Fluticasone              | 5311101         | CXCL1 |
| 20 | Angiotensin II Type 1 Receptor Blockers | Candesartan              | 2541            | CXCL1 |
|    |                                         | Losartan                 | 3961            | CXCL1 |
| 20 | fragrance component                     | Diacetyl                 | 650             | CXCL1 |
|    |                                         | Undecane                 | 14257           | CXCL1 |
| 20 | Histamine H2 Antagonists                | Famotidine               | 5702160         | CXCL1 |
|    |                                         | Ranitidine               | 3001055         | CXCL1 |
| 20 | Anti-Ulcer Agents                       | Famotidine               | 5702160         | CXCL1 |
|    |                                         | Ranitidine               | 3001055         | CXCL1 |
| 20 | Anesthetics, Inhalation                 | Halothane                | 3562            | CXCL1 |
|    |                                         | Sevoflurane              | 5206            | CXCL1 |
| 20 | Antimetabolites                         | Metirapone               | 4174            | CXCL1 |
|    |                                         | Tetrahydrouridine        | 29243           | CDA   |
| 20 | Platelet Aggregation Inhibitors         | Resveratrol              | 445154          | CXCL1 |
|    |                                         | Sevoflurane              | 5206            | CXCL1 |
| 20 | Anti-Infective Agents                   | Sulfasalazine            | 483928815 (SID) | CXCL1 |
|    |                                         | Trovaflaxacin            | 62959           | CXCL1 |

|    |                                             |                        |                 |                |
|----|---------------------------------------------|------------------------|-----------------|----------------|
| 20 | Antirheumatic Agents                        | Sulfasalazine          | 483928815 (SID) | CXCL1          |
|    |                                             | Cyclosporine           | 5284373         | TYMS           |
| 20 | Antineoplastic Agents, Alkylating           | Triptolide             | 107985          | CXCL1          |
|    |                                             | Melphalan              | 460612          | CDA            |
| 20 | Appetite Stimulants                         | Doxifluridine          | 18343           | LGALS4<br>TYMS |
| 20 | Antiparasitic/ Pediculicide                 | Ivermectin             | 6321424         | RRM2<br>TYMS   |
| 20 | coating components                          | Glycidyl methacrylate  | 7837            | TYMS           |
| 20 | Histone Deacetylase Inhibitors              | Trichostatin A         | 444732          | TYMS           |
|    |                                             | Vorinostat             | 5311            | TYMS           |
| 20 | Cholinesterase Inhibitors                   | Isoflurophate          | 5936            | CXCL1          |
|    |                                             | Pyridostigmine bromide | 7550            | CXCL1          |
| 37 | Keratolytic Agents                          | Tretinoin              | 444795          | DEFA3          |
| 37 | Angiotensin-Converting Enzyme Inhibitors    | Benazepril             | 5362124         | CXCL1          |
| 37 | Glucocorticoids                             | Budesonide             | 5281004         | CXCL1          |
| 37 | Flavouring Agents                           | Carvacrol              | 10364           | CXCL1          |
| 37 | Histamine H1 Antagonists, Non-Sedating      | Cetirizine             | 2678            | CXCL1          |
| 37 | Chemical Warfare Agents                     | Chlorine               | 24526           | CXCL1          |
| 37 | anti-hyperglycemic agent                    | Coagulin-L             | 10508451        | CXCL1          |
| 37 | Insect Repellents                           | Deet                   | 4284            | CXCL1          |
| 37 | Androgens                                   | Dihydrotestosterone    | 10635           | CXCL1          |
| 37 | Cannabinoid Receptor Agonists               | Dronabinol             | 16078           | CXCL1          |
| 37 | Analgesics, Non-Narcotic                    | Dronabinol             | 16078           | CXCL1          |
| 37 | Hallucinogens                               | Dronabinol             | 16078           | CXCL1          |
| 37 | Psychotropic Drugs                          | Dronabinol             | 16078           | CXCL1          |
| 37 | Free Radical Scavengers                     | Edaravone              | 4021            | CXCL1          |
| 37 | Neuroprotective Agents                      | Edaravone              | 4021            | CXCL1          |
| 37 | Calcium Channel Agonists                    | Icilin                 | 161930          | CXCL1          |
| 37 | Sodium Channel Agonists                     | Icilin                 | 161930          | CXCL1          |
| 37 | Tocolytic Agents                            | Indomethacin           | 3715            | CXCL1          |
| 37 | Cyclooxygenase Inhibitors                   | Indomethacin           | 3715            | CXCL1          |
| 37 | Gout Suppressants                           | Indomethacin           | 3715            | CXCL1          |
| 37 | Cardiovascular Agents                       | Indomethacin           | 3715            | CXCL1          |
| 37 | Protease Inhibitors                         | Isoflurophate          | 5936            | CXCL1          |
| 37 | Analgesics                                  | Ketamine               | 3821            | CXCL1          |
| 37 | Anesthetics, Dissociative                   | Ketamine               | 3821            | CXCL1          |
| 37 | Excitatory Amino Acid Antagonists           | Ketamine               | 3821            | CXCL1          |
| 37 | Anti-Arrhythmia Agents                      | Losartan               | 3961            | CXCL1          |
| 37 | Histamine H1 Antagonists                    | Methapyrilene          | 4098            | CXCL1          |
| 37 | Hypnotics and Sedatives                     | Methapyrilene          | 4098            | CXCL1          |
| 37 | Chelating Agents                            | Neocuproine            | 65237           | CXCL1          |
| 37 | Antibacterial                               | Polymyxin B            | 483926164 (SID) | CXCL1          |
| 37 | Sphingosine 1 Phosphate Receptor Modulators | Siponimod              | 44599207        | CXCL1          |
| 37 | Gastrointestinal Agents                     | Sulfasalazine          | 483928815 (SID) | CXCL1          |
| 37 | Air Pollutants                              | Sulfur dioxide         | 1119            | CXCL1          |
| 37 | Antispermatogetic Agents                    | Triptolide             | 107985          | CXCL1          |
| 37 | Antiemetics                                 | Tropisetron            | 656665          | CXCL1          |
| 37 | Serotonin 5-HT3 Receptor Antagonists        | Tropisetron            | 656665          | CXCL1          |
| 37 | Topoisomerase II Inhibitors                 | Trovafoxacin           | 62959           | CXCL1          |
| 37 | Lipoxygenase Inhibitors                     | Zileuton               | 60490           | CXCL1          |
| 37 | Leukotriene Antagonists                     | Zileuton               | 60490           | CXCL1          |
| 37 | Antipruritics                               | Menthol                | 1254            | CXCL6          |
| 37 | Myeloablative Agonists                      | Doxifluridine          | 18343           | LGALS4<br>TYMS |
| 37 | Alkylating Agents                           | Melphalan              | 460612          | CDA            |
| 37 | Antibiotics, Antineoplastic                 | Mitomycin              | 5746            | CDA            |

|    |                                   |                    |                    |       |
|----|-----------------------------------|--------------------|--------------------|-------|
| 37 | Mutagens                          | Mitomycin          | 5746               | CDA   |
| 37 | Topoisomerase I Inhibitors        | Camptothecin       | 24360              | RRM2  |
| 37 | Antineoplastic Agents, Phytogenic | Camptothecin       | 24360              | RRM2  |
| 37 | Chemosterilants                   | Alpha-Chlorohydrin | 7290               | TYMS  |
| 37 | Antiparkinson Agents              | Benztropine        | 1201549            | TYMS  |
| 37 | Dopamine Uptake Inhibitors        | Benztropine        | 1201549            | TYMS  |
| 37 | Parasympatholytics                | Benztropine        | 1201549            | TYMS  |
| 37 | Androgen Antagonists              | Bicalutamide       | 2375               | TYMS  |
| 37 | Calcineurin Inhibitors            | Cyclosporine       | 5284373            | TYMS  |
| 37 | Antidotes                         | Leucovorin         | 135403648          | TYMS  |
| 37 | Protein Synthesis Inhibitors      | Trichostatin A     | 444732             | TYMS  |
| 37 | Phenanthrenes                     | Boldine methine    | 152186869<br>(SID) | CXCL1 |
