# Supplementary material for: A System Biology Approach Reveals New Targets for Human Thyroid Gland Toxicity in Embryos and Adult Individuals
Source: MDPI journal article supplement (doi:10.3390/metabo14040226), 2024-04-16
Supplement: s1 [file s1]

Supplementary Table S2 - Summary of the interaction between chemical compounds and downregulated genes in embryonic thyroid

| Rank | MeSH Pharmacological Classification     | Chemical Compound              | PubChem CID     | Gene/Protein interaction                        |
|------|-----------------------------------------|--------------------------------|-----------------|-------------------------------------------------|
| 1    | Antihypertensive Agents                 | Atenolol                       | 2249            | APOA1<br>APOB                                   |
|      |                                         | Clonidine                      | 2803            | APOA1                                           |
|      |                                         | Benazepril                     | 5362124         | APOB<br>AMBP<br>KNG1                            |
|      |                                         | Bendroflumethiazide            | 2315            | APOB                                            |
|      |                                         | Linsidomine                    | 5219            | APOB                                            |
|      |                                         | Valsartan                      | 60846           | APOB<br>KNG1                                    |
|      |                                         | Diltiazem                      | 39186           | KNG1                                            |
|      |                                         | Enalapril                      | 5388962         | KNG1                                            |
|      |                                         | Perindopril                    | 107807          | KNG1                                            |
| 2    | Antioxidants                            | Ramipril                       | 5362129         | KNG1                                            |
|      |                                         | Ascorbic acid                  | 54670067        | APOA1<br>APOB<br>C5                             |
|      |                                         | Isoquercitrin                  | 5280804         | APOA1                                           |
|      |                                         | Probucol                       | 4912            | APOA1                                           |
|      |                                         | Resveratrol                    | 445154          | APOA1<br>APOB<br>APOM<br>AHSG<br>C5<br>SERPINC1 |
|      |                                         | Chrysin                        | 5281607         | APOB                                            |
|      |                                         | Gallic acid                    | 370             | APOB                                            |
| 2    | Natural compound                        | Ginger extract                 | 459636550 (SID) | APOM                                            |
|      |                                         | Coconut oil                    | 350085943 (SID) | APOA1                                           |
|      |                                         | Ginsenoside Rf                 | 441922          | APOA1                                           |
|      |                                         | Perilla seed oil               | 488414420 (SID) | APOA1                                           |
|      |                                         | Rapeseed oil                   | 350085953 (SID) | APOA1<br>APOB                                   |
|      |                                         | Safflower oil                  | 481189677 (SID) | APOA1                                           |
|      |                                         | Soybean oil                    | 53789874 (SID)  | APOA1                                           |
|      |                                         | Chrysin                        | 5281607         | APOB                                            |
|      |                                         | Gallic acid                    | 370             | APOB                                            |
|      |                                         | Ginger extract                 | 459636550 (SID) | APOM                                            |
|      |                                         | Erianin                        | 356759          | ITIH1                                           |
|      |                                         | Resiniferatoxin                | 5702546         | KNG1                                            |
| 2    | Anti-Inflammatory Agents, Non-Steroidal | Zingiberis rhizome carbonisata | 442882585 (SID) | SERPINA7                                        |
|      |                                         | Sulindac sulfide               | 5352624         | APOA1                                           |
|      |                                         | Taxifolin                      | 439533          | APOA1<br>APOB                                   |
|      |                                         | Indomethacin                   | 3715            | APOB<br>KNG1                                    |
|      |                                         | Sulindac                       | 1548887         | APOB                                            |
|      |                                         | Parthenolide                   | 7251185         | C5                                              |
|      |                                         | Flurbiprofen                   | 3394            | KNG1                                            |
|      |                                         | Icatibant                      | 6918173         | KNG1                                            |
|      |                                         | Meloxicam                      | 54677470        | KNG1                                            |

|    |                                          |                          |         |                                                 |
|----|------------------------------------------|--------------------------|---------|-------------------------------------------------|
|    |                                          | Nafamostat               | 4413    | KNG1                                            |
|    |                                          | Nimesulide               | 4495    | KNG1                                            |
|    |                                          | Pyranoprofen             | 4888    | KNG1                                            |
| 6  | Enzyme Inhibitors                        | Cyclosporine             | 5284373 | APOA1<br>SERPINC1                               |
|    |                                          | Resveratrol              | 445154  | APOA1<br>APOB<br>APOM<br>AHSG<br>C5<br>SERPINC1 |
|    |                                          | Linsidomine              | 5219    | APOB                                            |
|    |                                          | Thapsigargin             | 446378  | APOB<br>EYA1                                    |
|    |                                          | Pimagedine               | 2146    | LPA                                             |
|    |                                          | Cyclosporine             | 5284373 | APOA1<br>SERPINC1                               |
|    |                                          |                          |         |                                                 |
| 6  | Anticholesteremic Agents                 | Ezetimibe                | 150311  | APOA1                                           |
|    |                                          | Lovastatin               | 53232   | APOA1<br>APOB<br>LPA                            |
|    |                                          | Pirinixic acid           | 5694    | APOA1<br>APOB<br>APOH                           |
|    |                                          | Probucol                 | 4912    | APOA1                                           |
|    |                                          | Rosuvastatin calcium     | 5282455 | APOA1<br>APOB                                   |
| 9  | Immunosuppressive Agents                 | Cyclosporine             | 5284373 | APOA1<br>SERPINC1                               |
|    |                                          | Fingolimod hydrochloride | 107969  | APOA1                                           |
|    |                                          | Triptolide               | 107985  | APOA1<br>AMBP<br>KNG1<br>SERPINC1               |
|    |                                          | Busulfan                 | 2478    | SERPINC1                                        |
| 9  | Antineoplastic agent                     | Ginsenoside Rf           | 441922  | APOA1                                           |
|    |                                          | Pyrazolanthrone          | 8515    | APOA1                                           |
|    |                                          | Sulindac sulfide         | 5352624 | APOA1                                           |
|    |                                          | Chrysin                  | 5281607 | APOB                                            |
|    |                                          | Gallic acid              | 370     | APOB                                            |
|    |                                          | Sulindac                 | 1548887 | APOB                                            |
|    |                                          | Tretinoin                | 444795  | AMBP                                            |
| 9  | Hypolipidemic Agents                     | Bezafibrate              | 39042   | APOA1<br>APOB                                   |
|    |                                          | Ciprofibrate             | 2763    | APOA1                                           |
|    |                                          | Fenofibrate              | 3339    | APOA1<br>APOB                                   |
|    |                                          | Gemfibrozil              | 3463    | APOA1<br>APOB                                   |
| 9  | Platelet Aggregation Inhibitors          | Resveratrol              | 445154  | APOA1<br>APOB<br>APOM<br>AHSG<br>C5<br>SERPINC1 |
|    |                                          | Linsidomine              | 5219    | APOB                                            |
| 9  | Anti-Bacterial Agents                    | Ampicillin               | 6249    | AHSG                                            |
|    |                                          | Metronidazole            | 4173    | AHSG                                            |
|    |                                          | Vancomycin               | 14969   | AHSG                                            |
|    |                                          | Amphotericin B           | 5280965 | AMBP                                            |
|    |                                          | Neomycin                 | 8378    | AHSG                                            |
|    |                                          | Octanoic acid            | 379     | KNG1<br>SERPINA7                                |
| 12 | Angiotensin-Converting Enzyme Inhibitors | Benazepril               | 5362124 | APOB<br>AMBP                                    |

|    |                                                |                                              |                |                                                     |
|----|------------------------------------------------|----------------------------------------------|----------------|-----------------------------------------------------|
|    |                                                |                                              |                | KNG1                                                |
|    |                                                | Enalapril                                    | 5388962        | KNG1                                                |
|    |                                                | Perindopril                                  | 107807         | KNG1                                                |
|    |                                                | Ramipril                                     | 5362129        | KNG1                                                |
| 12 | Antineoplastic Agents, Phytogetic              | Senecionine                                  | 5280906        | APOB<br>APOH<br>APOM<br>C5<br>SERPINA10<br>SERPINA7 |
| 14 | Food Additives                                 | Dioleoyl ethylene glycol                     | 5378708        | APOA1                                               |
|    |                                                | Potassium persulfate                         | 24412          | APOA1                                               |
|    |                                                | Sodium acetate                               | 517045         | APOB                                                |
| 14 | Flame retardant                                | Hexabrominated diphenyl ether 153 (PBDE 153) | 53787637 (SID) | APOA1<br>APOB<br>KNG1<br>SERPINA10<br>SERPINA7      |
| 14 | Hydroxymethylglutaryl-CoA Reductase Inhibitors | Lovastatin                                   | 53232          | APOA1<br>APOB<br>LPA                                |
|    |                                                | Rosuvastatin calcium                         | 5282455        | APOA1<br>APOB                                       |
| 14 | Antiemetics                                    | Olanzapine                                   | 135398745      | APOA1<br>APOB<br>APOH<br>C5<br>KNG1                 |
| 14 | Antipsychotic Agents                           | Olanzapine                                   | 135398745      | APOA1<br>APOB<br>APOH<br>C5<br>KNG1                 |
| 14 | Selective Serotonin Reuptake Inhibitors        | Olanzapine                                   | 135398745      | APOA1<br>APOB<br>APOH<br>C5<br>KNG1                 |
| 14 | Antineoplastic Agents, Alkylating              | Triptolide                                   | 107985         | APOA1<br>AMBP<br>KNG1<br>SERPINC1                   |
|    |                                                | Busulfan                                     | 2478           | SERPINC1                                            |
| 14 | Cyclooxygenase Inhibitors                      | Indomethacin                                 | 3715           | APOB<br>KNG1                                        |
|    |                                                | Sulindac                                     | 1548887        | APOB                                                |
|    |                                                | Flurbiprofen                                 | 3394           | KNG1                                                |
|    |                                                | Nimesulide                                   | 4495           | KNG1                                                |
| 22 | Anti-Arrhythmia Agents                         | Atenolol                                     | 2249           | APOA1<br>APOB                                       |
|    |                                                | Losartan                                     | 3961           | AMBP<br>KNG1                                        |
| 22 | Peroxisome Proliferators                       | Ciprofibrate                                 | 2763           | APOA1                                               |
|    |                                                | Pirinixic acid                               | 5694           | APOA1<br>APOB<br>APOH                               |
| 22 | Antifungal Agents                              | Amphotericin B                               | 5280965        | AMBP                                                |
|    |                                                | Cyclosporine                                 | 5284373        | APOA1<br>SERPINC1                                   |
|    |                                                | Cycloheximide                                | 6197           | KNG1                                                |
| 22 | Solvents                                       | Dimethyl sulfoxide                           | 679            | APOA1                                               |
|    |                                                | Trichloroethylene (TCE)                      | 6575           | AMBP<br>C5<br>KNG1                                  |
| 22 | Hypoglycemic Agents                            | Glyburide                                    | 3488           | APOA1                                               |
|    |                                                | Pioglitazone                                 | 4829           | APOA1                                               |

|    |                                         |                     |                    |                                   |
|----|-----------------------------------------|---------------------|--------------------|-----------------------------------|
|    |                                         |                     |                    | APOB                              |
|    |                                         | Phenformin          | 8249               | SERPINC1                          |
| 22 | Carcinogens                             | Pirinixic acid      | 5694               | APOA1<br>APOB<br>APOH             |
|    |                                         | Aristolochic acid I | 2236               | C5                                |
| 22 | Mutagens                                | Pirinixic acid      | 5694               | APOA1<br>APOB<br>APOH             |
|    |                                         | Aristolochic acid I | 2236               | C5                                |
| 22 | Antispermatogetic Agents                | Triptolide          | 107985             | APOA1<br>AMBP<br>KNG1<br>SERPINC1 |
| 22 | Gout Suppressants                       | Indomethacin        | 3715               | APOB<br>KNG1                      |
|    |                                         | Colchicine          | 6167               | AMBP                              |
|    |                                         | Pyranoprofen        | 4888               | KNG1                              |
| 22 | Angiotensin II Type 1 Receptor Blockers | Valsartan           | 60846              | APOB<br>KNG1                      |
|    |                                         | Losartan            | 3961               | AMBP<br>KNG1                      |
| 32 | Sympatholytics                          | Atenolol            | 2249               | APOA1<br>APOB                     |
|    |                                         | Clonidine           | 2803               | APOA1                             |
| 32 | Vasodilator Agents                      | Bucladesine         | 9687               | APOA1                             |
|    |                                         | Linsidomine         | 5219               | APOB                              |
|    |                                         | Diltiazem           | 39186              | KNG1                              |
| 32 | Analgesics                              | Clonidine           | 2803               | APOA1                             |
|    |                                         | Flurbiprofen        | 3394               | KNG1                              |
|    |                                         | Ketamine            | 3821               | KNG1                              |
| 32 | Antirheumatic Agents                    | Cyclosporine        | 5284373            | APOA1<br>SERPINC1                 |
|    |                                         | Glucosamine         | 53786989<br>(SID)  | APOB                              |
| 32 | Dermatologic Agents                     | Cyclosporine        | 5284373            | APOA1<br>SERPINC1                 |
|    |                                         | Hyaluronic acid     | 481108865<br>(SID) | ITIH1                             |
| 32 | Alkylating Agents                       | Diethylnitrosamine  | 5921               | APOA1                             |
|    |                                         | Busulfan            | 2478               | SERPINC1                          |
|    |                                         | Mitomycin           | 5746               | HEY1                              |
| 32 | Antipruritics                           | Menthol             | 1254               | APOA1                             |
|    |                                         | Capsaicin           | 1548943            | APOB                              |
| 32 | Tocolytic Agents                        | Sulindac sulfide    | 5352624            | APOA1                             |
|    |                                         | Indomethacin        | 3715               | APOB<br>KNG1                      |
| 32 | Reagents                                | Ethanolamine        | 700                | APOB                              |
|    |                                         | Thioacetamide       | 2723949            | APOB                              |
|    |                                         | Potassium chloride  | 4873               | KNG1                              |
| 32 | Cardiovascular Agents                   | Indomethacin        | 3715               | APOB<br>KNG1                      |
|    |                                         | Diltiazem           | 39186              | KNG1                              |
| 32 | Antiparasitic/ Pediculicide             | Ivermectin          | 6321424            | APOB<br>C5<br>SERPINC1            |
| 32 | Protease Inhibitors                     | Isoflurophate       | 5936               | APOH                              |
|    |                                         | Nafamostat          | 4413               | KNG1                              |
|    |                                         | Racecadotril        | 107751             | KNG1                              |
| 32 | Estrogen Antagonists                    | Danazol             | 28417              | LPA                               |
|    |                                         | Tamoxifen           | 2733526            | SERPINA7<br>SERPINC1              |
| 32 | Bone Density Conservation Agents        | Zoledronic acid     | 68740              | AHSG                              |
|    |                                         | Tamoxifen           | 2733526            | SERPINA7<br>SERPINC1              |

|    |                                                                  |                          |                 |                      |
|----|------------------------------------------------------------------|--------------------------|-----------------|----------------------|
| 32 | Anesthetics, Inhalation                                          | Trichloroethylene (TCE)  | 6575            | AMBP<br>C5<br>KNG1   |
| 32 | Anti-coagulant, antithrombotic properties                        | Heparin                  | 481108841 (SID) | C5<br>SERPINC1       |
|    |                                                                  | Dalteparin               | 772             | SERPINC1             |
| 48 | Adrenergic beta-1 Receptor Antagonists                           | Atenolol                 | 2249            | APOA1<br>APOB        |
| 48 | Calcineurin Inhibitors                                           | Cyclosporine             | 5284373         | APOA1<br>SERPINC1    |
| 48 | Cytochrome P-450 CYP2C8 Inhibitors                               | Gemfibrozil              | 3463            | APOA1<br>APOB        |
| 48 | Chelating Agents                                                 | Pentetic acid            | 3053            | APOA1                |
|    |                                                                  | Trientine                | 5565            | APOA1                |
| 48 | kinase inhibitor                                                 | Pyrazolanthrone          | 8515            | APOA1                |
|    |                                                                  | Chrysin                  | 5281607         | APOB                 |
| 48 | Antiparkinson Agents                                             | Tolcapone                | 4659569         | APOA1<br>APOB        |
| 48 | Catechol O-Methyltransferase Inhibitors                          | Tolcapone                | 4659569         | APOA1<br>APOB        |
| 48 | Sensory System Agents                                            | Capsaicin                | 1548943         | APOB                 |
| 48 | Anti-inflammatory agents                                         | Chrysin                  | 5281607         | APOB                 |
|    |                                                                  | Hydrocortisone           | 5754            | SERPINC1             |
| 48 | Adjuvants, Immunologic                                           | Aconitine                | 245005          | APOM<br>KNG1         |
| 48 | Voltage-Gated Sodium Channel Agonists                            | Aconitine                | 245005          | APOM<br>KNG1         |
|    |                                                                  | Aconitine                | 245005          | APOM<br>KNG1         |
| 48 | Antibiotics, Antineoplastic                                      | Bleomycin                | 5360373         | AHSG                 |
|    |                                                                  | Mitomycin                | 5746            | HEY1                 |
| 48 | Antiprotozoal Agents                                             | Metronidazole            | 4173            | AHSG                 |
|    |                                                                  | Amphotericin B           | 5280965         | AMBP                 |
| 48 | Tubulin Modulators                                               | Colchicine               | 6167            | AMBP                 |
|    |                                                                  | Oryzalin                 | 29393           | KNG1                 |
| 48 | Anticoagulants                                                   | Nafamostat               | 4413            | KNG1                 |
|    |                                                                  | Calcium heparin          | 134224540 (SID) | SERPINC1             |
| 48 | Contraceptive Agents, Hormonal / Contraceptives, Oral, Synthetic | Norgestimate             | 6540478         | SERPINA7<br>SERPINC1 |
| 48 | Antineoplastic Agents, Hormonal                                  | Tamoxifen                | 2733526         | SERPINA7<br>SERPINC1 |
| 48 | Selective Estrogen Receptor Modulators                           | Tamoxifen                | 2733526         | SERPINA7<br>SERPINC1 |
| 66 | antidiabetics                                                    | Apabetalone              | 135564749       | APOA1                |
| 66 | BET Inhibitor                                                    | Apabetalone              | 135564749       | APOA1                |
| 66 | Chemical Warfare Agents                                          | Chlorine                 | 24526           | APOA1                |
| 66 | Adrenergic alpha-2 Receptor Agonists                             | Clonidine                | 2803            | APOA1                |
| 66 | Cryoprotective Agents                                            | Dimethyl sulfoxide       | 679             | APOA1                |
| 66 | Free Radical Scavengers                                          | Dimethyl sulfoxide       | 679             | APOA1                |
| 66 | Sphingosine 1 Phosphate Receptor Modulators                      | Fingolimod hydrochloride | 107969          | APOA1                |
| 66 | Anti-HIV Agents                                                  | Nevirapine               | 4463            | APOA1                |
| 66 | Cytochrome P-450 CYP3A Inducers                                  | Nevirapine               | 4463            | APOA1                |
| 66 | Reverse Transcriptase Inhibitors                                 | Nevirapine               | 4463            | APOA1                |
| 66 | Iron Chelating Agents                                            | Pentetic acid            | 3053            | APOA1                |
| 66 | Antidotes                                                        | Pentetic acid            | 3053            | APOA1                |
| 66 | Anticarcinogenic Agents                                          | Perilla seed oil         | 488414420 (SID) | APOA1                |
| 66 | Antiseptic                                                       | Potassium persulfate     | 24412           | APOA1                |
| 66 | Diuretics                                                        | Bendroflumethiazide      | 2315            | APOB                 |
| 66 | Sodium Chloride Symporter Inhibitors                             | Bendroflumethiazide      | 2315            | APOB                 |
| 66 | hepatoprotective agent                                           | Chrysin                  | 5281607         | APOB                 |
| 66 | Preservative                                                     | Diethyl pyrocarbonate    | 3051            | APOB                 |

|    |                                    |                                       |                 |                   |
|----|------------------------------------|---------------------------------------|-----------------|-------------------|
| 66 | Sclerosing Agent                   | Ethanolamine                          | 700             | APOB              |
| 66 | Astringent                         | Gallic acid                           | 370             | APOB              |
| 66 | HIV Protease Inhibitors            | Indinavir                             | 5362440         | APOB              |
| 66 | Nitric Oxide Donors                | Linsidomine                           | 5219            | APOB              |
| 66 | Muscarinic Antagonists             | Propiverine                           | 4942            | APOB              |
| 66 | Urological Agents                  | Propiverine                           | 4942            | APOB              |
| 66 | Parasympatholytics                 | Propiverine                           | 4942            | APOB              |
| 66 | Anti-Obesity Agents                | Rimonabant                            | 104850          | APOB              |
| 66 | Cannabinoid Receptor Antagonists   | Rimonabant                            | 104850          | APOB              |
| 66 | Antimetabolites, Antineoplastic    | Gemcitabine                           | 60750           | APOH              |
| 66 | Cholinesterase Inhibitors          | Isoflurophate                         | 5936            | APOH              |
| 66 | Anti-Infective Agents              | Metronidazole                         | 4173            | AHSG              |
| 66 | Amebicides                         | Amphotericin B                        | 5280965         | AMBP              |
| 66 | Keratolytic Agents                 | Tretinoin                             | 444795          | AMBP              |
| 66 | Siderophores                       | Deferoxamine                          | 2973            | C5                |
| 66 | Salts                              | Dithionite                            | 1086            | C5                |
| 66 | Laxative                           | Magnesium chloride                    | 5360315         | ITI1              |
| 66 | Uricosuric Agents                  | Benzbromarone                         | 2333            | KNG1              |
| 66 | Protein Synthesis Inhibitors       | Cycloheximide                         | 6197            | KNG1              |
| 66 | Calcium Channel Blockers           | Diltiazem                             | 39186           | KNG1              |
| 66 | Oxytocics                          | Dinoprostone                          | 5280360         | KNG1              |
| 66 | Bradykinin B2 Receptor Antagonists | Icatibant                             | 6918173         | KNG1              |
| 66 | Anesthetics, Dissociative          | Ketamine                              | 3821            | KNG1              |
| 66 | Excitatory Amino Acid Antagonists  | Ketamine                              | 3821            | KNG1              |
| 66 | Cyclooxygenase 2 Inhibitors        | Meloxicam                             | 54677470        | KNG1              |
| 66 | Serine Proteinase Inhibitors       | Nafamostat                            | 4413            | KNG1              |
| 66 | Trypsin Inhibitors                 | Nafamostat                            | 4413            | KNG1              |
| 66 | Complement Inactivating Agents     | Nafamostat                            | 4413            | KNG1              |
| 66 | Coccidiostats                      | Oryzalin                              | 29393           | KNG1              |
| 66 | Herbicides                         | Oryzalin                              | 29393           | KNG1              |
| 66 | Anesthetics, Intravenous           | Propofol                              | 4943            | KNG1              |
| 66 | Hypnotics and Sedatives            | Propofol                              | 4943            | KNG1              |
| 66 | Histamine H1 Antagonists           | Pyrimidine                            | 4992            | KNG1              |
| 66 | Anti-Allergic Agents               | Pyrimidine                            | 4992            | KNG1              |
| 66 | Sleep Aids, Pharmaceutical         | Pyrimidine                            | 4992            | KNG1              |
| 66 | Antidiarrheals                     | Racecadotril                          | 107751          | KNG1              |
| 66 | Bronchodilator Agents              | Verlukast                             | 6509849         | KNG1              |
| 66 | Leukotriene Antagonists            | Verlukast                             | 6509849         | KNG1              |
| 66 | organobromine compound             | Hexabromodiphenyl ether 154 (BDE 154) | 15509898        | SERPINA7          |
| 66 | Antifibrinolytic Agents            | Aminocaproic acid                     | 564             | SERPINC1          |
| 66 | Myeloablative Agonists             | Busulfan                              | 2478            | SERPINC1          |
| 66 | Fibrinolytic Agents                | Calcium heparin                       | 134224540 (SID) | SERPINC1          |
| 66 | Calcineurin Inhibitors             | Cyclosporine                          | 5284373         | APOA1<br>SERPINC1 |
| 66 | Cross-Linking Reagents             | Mitomycin                             | 5746            | HEY1              |
| 66 | Nucleic Acid Synthesis Inhibitors  | Mitomycin                             | 5746            | HEY1              |
