# Supplementary material for: A System Biology Approach Reveals New Targets for Human Thyroid Gland Toxicity in Embryos and Adult Individuals
Source: MDPI journal article supplement (doi:10.3390/metabo14040226), 2024-04-16
Supplement: s1 [file s1]

Supplementary Table S3 - Summary of the interaction between chemical compounds and upregulated genes in adult thyroid

| Rank | MeSH Pharmacological Classification | Chemical Compound                                                 | PubChem CID | Gene/Protein interaction |
|------|-------------------------------------|-------------------------------------------------------------------|-------------|--------------------------|
| 1    | Enzyme Inhibitors                   | Propargylglycine                                                  | 185909      | MT1G<br>MT1X             |
|      |                                     | 2-(4-nitrophenyl)-4-(4-fluorophenyl)-5-(4-pyridinyl)-1H-imidazole | 4712        | BMP2                     |
|      |                                     | 4-(4-fluorophenyl)-2-(4-hydroxyphenyl)-5-(4-pyridyl)imidazole     | 5169        | BMP2<br>EGR1             |
|      |                                     | Decitabine                                                        | 451668      | BMP2                     |
|      |                                     | Digoxin                                                           | 2724385     | EGR1                     |
|      |                                     | Fluoranthene                                                      | 9154        | EGR1                     |
|      |                                     | Resveratrol                                                       | 445154      | BMP2<br>EGR1<br>NRG1     |
| 2    | Antineoplastic Agents               | Fenretinide                                                       | 5288209     | BMP2                     |
|      |                                     | Tretinoin                                                         | 444795      | BMP2                     |
|      |                                     | Mitoxantrone                                                      | 4212        | EGR1                     |
|      |                                     | Protopanaxadiol                                                   | 9920281     | EGR1                     |
|      |                                     | Pyrazolanthrone                                                   | 8515        | EGR1                     |
|      |                                     | Tephrosin                                                         | 114909      | NRG1                     |
|      |                                     | Pterostilbene                                                     | 5281727     | NRG1                     |
| 3    | Antihypertensive Agents             | Losartan                                                          | 3961        | BMP2                     |
|      |                                     | Enalapril                                                         | 5388962     | EGR1                     |
|      |                                     | Metoprolol                                                        | 4171        | EGR1                     |
|      |                                     | Nimodipine                                                        | 4497        | EGR1                     |
|      |                                     | Propranolol                                                       | 4946        | EGR1                     |
|      |                                     | Reserpine                                                         | 5770        | EGR1                     |
| 4    | natural product                     | Aucubin                                                           | 91458       | BMP2                     |
|      |                                     | Beta-glycerophosphoric acid                                       | 2526        | BMP2                     |
|      |                                     | Protopanaxadiol                                                   | 9920281     | EGR1                     |
|      |                                     | Pterostilbene                                                     | 5281727     | NRG1                     |
|      |                                     | Tephrosin                                                         | 114909      | NRG1                     |
| 5    | Anti-Arrhythmia Agents              | Losartan                                                          | 3961        | BMP2                     |
|      |                                     | Digoxin                                                           | 2724385     | EGR1                     |
|      |                                     | Metoprolol                                                        | 4171        | EGR1                     |
|      |                                     | Propranolol                                                       | 4946        | EGR1                     |
| 5    | Antioxidants                        | 3,4-dihydroxyphenylethanol                                        | 82755       | EGR1                     |
|      |                                     | Resveratrol                                                       | 445154      | BMP2<br>EGR1<br>NRG1     |
|      |                                     | Pterostilbene                                                     | 5281727     | NRG1                     |
| 7    | Arsenicals                          | 4-aminophenylarsenoxide                                           | 14290       | MT1G<br>MT1H<br>MT1X     |
| 7    | Protein Kinase Inhibitors           | 2-(2-amino-3-methoxyphenyl)-4H-1-benzopyran-4-one                 | 4713        | EGR1<br>NRG1             |
|      |                                     | Pyrazolanthrone                                                   | 8515        | EGR1                     |
| 7    | Platelet Aggregation Inhibitors     | 3,4-dihydroxyphenylethanol                                        | 82755       | EGR1                     |
|      |                                     | Resveratrol                                                       | 445154      | BMP2<br>EGR1<br>NRG1     |
|      |                                     | 3-(4-methylphenylsulfonyl)-2-propenenitrile                       | 5353431     | EGR1                     |
| 7    | Vasodilator Agents                  | Colforsin                                                         | 47936       | EGR1                     |
|      |                                     | Nimodipine                                                        | 4497        | EGR1                     |
|      |                                     | Propranolol                                                       | 4946        | EGR1                     |
| 7    | Antipsychotic Agents                | Reserpine                                                         | 5770        | EGR1                     |

|    |                                                                         |                                                                                                          |                    |              |
|----|-------------------------------------------------------------------------|----------------------------------------------------------------------------------------------------------|--------------------|--------------|
|    |                                                                         | Risperidone                                                                                              | 5073               | EGR1<br>NRG1 |
| 12 | Hydroxymethylglutaryl-CoA<br>Reductase Inhibitors                       | Atorvastatin                                                                                             | 60823              | BMP2         |
|    |                                                                         | Cerivastatin                                                                                             | 446156             | BMP2         |
| 12 | Insecticides                                                            | Azadirachtin                                                                                             | 5281303            | BMP2         |
|    |                                                                         | 1-naphthylisothiocyanate                                                                                 | 11080              | EGR1         |
| 12 | Antineoplastic Agents, Phytogetic                                       | Ginsenoside Rg3                                                                                          | 9918693            | BMP2         |
|    |                                                                         | Silybin                                                                                                  | 31553              | EGR1         |
| 12 | Histone Deacetylase Inhibitors                                          | Trichostatin A                                                                                           | 444732             | BMP2<br>EGR1 |
| 12 | Protein Synthesis Inhibitors                                            | Trichostatin A                                                                                           | 444732             | BMP2<br>EGR1 |
| 12 | Antifungal Agents                                                       | Trichostatin A                                                                                           | 444732             | BMP2<br>EGR1 |
| 12 | Cardiotonic Agents                                                      | Colforsin                                                                                                | 47936              | EGR1         |
|    |                                                                         | Digoxin                                                                                                  | 2724385            | EGR1         |
| 12 | Neuroprotective Agents                                                  | Dizocilpine maleate                                                                                      | 6420042            | EGR1         |
|    |                                                                         | Pterostilbene                                                                                            | 5281727            | NRG1         |
| 12 | Cardiovascular Agents                                                   | Indomethacin                                                                                             | 3715               | EGR1         |
|    |                                                                         | Ranolazine                                                                                               | 56959              | EGR1         |
| 12 | Dopamine Antagonists                                                    | Risperidone                                                                                              | 5073               | EGR1<br>NRG1 |
| 12 | Serotonin Antagonists                                                   | Risperidone                                                                                              | 5073               | EGR1<br>NRG1 |
| 12 | Muscarinic Antagonists                                                  | Scopolamine                                                                                              | 3000322            | EGR1         |
|    |                                                                         | Propiverine                                                                                              | 4942               | HSD17B6      |
| 24 | Carcinogenic                                                            | Glycidyl methacrylate                                                                                    | 7837               | MT1X         |
| 24 | coating components                                                      | Glycidyl methacrylate                                                                                    | 7837               | MT1X         |
| 24 | A gap junction inhibitor                                                | 18alpha-glycyrrhetic acid                                                                                | 73398              | BMP2         |
| 24 | Herbicides                                                              | 1-Methyl-4-phenylpyridinium<br>(Cyperquat)                                                               | 39484              | BMP2         |
| 24 | osteogenic activity                                                     | (4-(7-chloroquinolin-4-<br>yl)piperazino)(1-phenyl-5-<br>(trifluoromethyl)-1H-pyrazol-4-<br>yl)methanone | 310264838<br>(SID) | BMP2         |
| 24 | Anticholesteremic Agents                                                | Atorvastatin                                                                                             | 60823              | BMP2         |
| 24 | Antimetabolites, Antineoplastic                                         | Decitabine                                                                                               | 451668             | BMP2         |
| 24 | Adrenergic alpha-Agonists                                               | Epinephrine                                                                                              | 5816               | BMP2         |
| 24 | Antineoplastic Agents, Hormonal                                         | Tamoxifen                                                                                                | 2733526            | NRG1         |
| 24 | Anticarcinogenic Agents                                                 | Fenretinide                                                                                              | 5288209            | BMP2         |
| 24 | Angiotensin II Type 1 Receptor<br>Blockers                              | Losartan                                                                                                 | 3961               | BMP2         |
| 24 | Hemostatics                                                             | Menatetrenone                                                                                            | 5282367            | BMP2         |
| 24 | Hormones                                                                | Pasireotide                                                                                              | 9941444            | BMP2         |
| 24 | Keratolytic Agents                                                      | Tretinoin                                                                                                | 444795             | BMP2         |
| 24 | Chelating Agents                                                        | 1,2-bis(2-aminophenoxy)ethane<br>N,N,N',N'-tetraacetic acid<br>acetoxymethyl ester                       | 3034747            | EGR1         |
| 24 | Immunologic Factors                                                     | 15-deoxy-delta(12,14)-<br>prostaglandin J2                                                               | 5311211            | EGR1         |
| 24 | Anilides                                                                | 2-chloro-5-nitrobenzanilide<br>(GW9662)                                                                  | 644213             | EGR1         |
| 24 | Anti-Infective Agents                                                   | 3,4-dihydroxyphenylethanol                                                                               | 82755              | EGR1         |
| 24 | inhibitor of cytokine-induced<br>I $\kappa$ B- $\alpha$ phosphorylation | 3-(4-methylphenylsulfonyl)-2-<br>propenenitrile                                                          | 5353431            | EGR1         |
| 24 | Prostaglandin Antagonists                                               | 6-isopropoxy-9-oxoxanthene-2-<br>carboxylic acid                                                         | 119461             | EGR1         |
| 24 | Adjuvants, Immunologic                                                  | Colforsin                                                                                                | 47936              | EGR1         |
| 24 | Bronchodilator Agents                                                   | Colforsin                                                                                                | 47936              | EGR1         |
| 24 | Excitatory Amino Acid<br>Antagonists                                    | Dizocilpine maleate                                                                                      | 6420042            | EGR1         |
| 24 | Hallucinogens                                                           | Dronabinol                                                                                               | 16078              | EGR1         |
| 24 | Psychotropic Drugs                                                      | Dronabinol                                                                                               | 16078              | EGR1         |
| 24 | Cannabinoid Receptor Agonists                                           | Dronabinol                                                                                               | 16078              | EGR1         |
| 24 | Analgesics, Non-Narcotic                                                | Dronabinol                                                                                               | 16078              | EGR1         |

|    |                                          |                         |                 |         |
|----|------------------------------------------|-------------------------|-----------------|---------|
| 24 | Angiotensin-Converting Enzyme Inhibitors | Enalapril               | 5388962         | EGR1    |
| 24 | Anti-Inflammatory Agents, Non-Steroidal  | Indomethacin            | 3715            | EGR1    |
| 24 | Tocolytic Agents                         | Indomethacin            | 3715            | EGR1    |
| 24 | Cyclooxygenase Inhibitors                | Indomethacin            | 3715            | EGR1    |
| 24 | Gout Suppressants                        | Indomethacin            | 3715            | EGR1    |
| 24 | Calcium Ionophores                       | Ionomycin               | 6912226         | EGR1    |
| 24 | Sympatholytics                           | Metoprolol              | 4171            | EGR1    |
| 24 | Adrenergic beta-1 Receptor Antagonists   | Metoprolol              | 4171            | EGR1    |
| 24 | Cross-Linking Reagents                   | Mitomycin               | 5746            | EGR1    |
| 24 | Alkylating Agents                        | Mitomycin               | 5746            | EGR1    |
| 24 | Antibiotics, Antineoplastic              | Mitomycin               | 5746            | EGR1    |
| 24 | Nucleic Acid Synthesis Inhibitors        | Mitomycin               | 5746            | EGR1    |
| 24 | Topoisomerase II Inhibitors              | Mitoxantrone            | 4212            | EGR1    |
| 24 | Analgesics                               | Mitoxantrone            | 4212            | EGR1    |
| 24 | Calcium Channel Blockers                 | Nimodipine              | 4497            | EGR1    |
| 24 | Adrenergic beta-Antagonists              | Propranolol             | 4946            | EGR1    |
| 24 | Sodium Channel Blockers                  | Ranolazine              | 56959           | EGR1    |
| 24 | Antimitotic Agents                       | Razoxane                | 30623           | EGR1    |
| 24 | Adrenergic Uptake Inhibitors             | Reserpine               | 5770            | EGR1    |
| 24 | Cholinergic Antagonists                  | Scopolamine             | 3000322         | EGR1    |
| 24 | Mydriatics                               | Scopolamine             | 3000322         | EGR1    |
| 24 | Adjuvants, Anesthesia                    | Scopolamine             | 3000322         | EGR1    |
| 24 | Antiemetics                              | Scopolamine             | 3000322         | EGR1    |
| 24 | Protective Agents                        | Silybin                 | 31553           | EGR1    |
| 24 | Contraceptive Agents, Hormonal           | Sulprostone             | 5312153         | EGR1    |
| 24 | Abortifacient Agents, Nonsteroidal       | Sulprostone             | 5312153         | EGR1    |
| 24 | Menstruation-Inducing Agents             | Sulprostone             | 5312153         | EGR1    |
| 24 | Anesthetics, Inhalation                  | Trichloroethylene (TCE) | 6575            | EGR1    |
| 24 | Solvents                                 | Trichloroethylene (TCE) | 6575            | EGR1    |
| 24 | Nicotinic Antagonists                    | Vecuronium bromide      | 39764           | EGR1    |
| 24 | Neuromuscular Nondepolarizing Agents     | Vecuronium bromide      | 39764           | EGR1    |
| 24 | Androgens                                | Dihydrotestosterone     | 10635           | HSD17B6 |
| 24 | Urological Agents                        | Propiverine             | 4942            | HSD17B6 |
| 24 | Parasympatholytics                       | Propiverine             | 4942            | HSD17B6 |
| 24 | Antiperspirant                           | Aluminum chlorhydrate   | 406845004 (SID) | NRG1    |
| 24 | Mutagens                                 | Aristolochic acid I     | 2236            | NRG1    |
| 24 | Carcinogens                              | Aristolochic acid I     | 2236            | NRG1    |
| 24 | Bone Density Conservation Agents         | Tamoxifen               | 2733526         | NRG1    |
| 24 | Estrogen Antagonists                     | Tamoxifen               | 2733526         | NRG1    |
| 24 | Selective Estrogen Receptor Modulators   | Tamoxifen               | 2733526         | NRG1    |
| 24 | pesticidal activities                    | Tephrosin               | 114909          | NRG1    |
